# Supplementary material for: The Picornavirus Precursor 3CD Has Different Conformational Dynamics Compared to 3Cpro and 3Dpol in Functionally Relevant Regions
Source: PubMed Central journal article supplement (PMC8001691; doi:10.3390/v13030442), 2021-03-09
Supplement: viruses-13-00442-s001.pdf [file viruses-13-00442-s001.pdf]

## Supplementary Materials

### The picornavirus precursor 3CD has different conformational dynamics compared to 3C<sup>Pro</sup> and 3D<sup>Pol</sup> in functionally-relevant regions

Dennis S. Winston and David D. Boehr\*

The Pennsylvania State University, University Park, PA, USA, 16802

\*Corresponding Author: ddb12@psu.edu

#### Supplementary Methods

##### *Validation of rotational correlation time $\tau_c$ by TRACT*

1D [<sup>15</sup>N-<sup>1</sup>H]-TRACT experiments were performed as previously described [1] at 850 MHz at 298 K, with delay periods for determining  $R_\alpha$  of 10, 40, 80, 20, 60, 100, 50, 70, and 10 ms and delay periods for determining  $R_\beta$  of 0.02, 6, 2.8, 8.4, 0.4, 1.6, 0.8, 10, 4.4, 0.2, 7.4, 2, 3.6, 5.2, 1.2, 20, 1.5, and 0.02 ms. For each delay, the resulting 1D spectra were integrated from 8-10 ppm. The resulting curves of integral versus delay period were fit for single exponential decay rates by nonlinear least squares with uncertainty determined by residual bootstrapping (Figure S5). Equations 1 and 2 were used to calculate  $\tau_c$  [1]:

$$R_\beta - R_\alpha = 1/6 (\mu_0/4\pi) (\hbar\gamma_N^2\gamma_H B_0\Delta\delta_N)/(r_{NH}^2) (3\cos^2\theta - 1)(4J(0) + 3J(\omega_N)) \quad (1)$$

$$J(\omega) = 2/5 \tau_c / (1 + \omega^2\tau_c^2) \quad (2)$$

where  $R_\alpha$  and  $R_\beta$  are the decay rates for the  $\alpha$  and  $\beta$  spin states,  $\mu_0$  is the vacuum permittivity constant,  $\gamma_N$  and  $\gamma_H$  are the gyromagnetic ratios for <sup>15</sup>N and <sup>1</sup>H respectively,  $B_0$  is the strength of the external magnetic field,  $\Delta\delta_N$  is the difference between the two principal components of the axially symmetric <sup>15</sup>N chemical shift tensor,  $r_{NH}$  is the <sup>1</sup>H-<sup>15</sup>N internuclear distance ( $1.02 \times 10^{-10}$  m),  $\theta$  is the angle between the <sup>15</sup>N chemical shift tensor and the N-H bond vector ( $17^\circ$ ), and  $\omega_N$  is the Larmor frequency for <sup>15</sup>N. To account for the difference in viscosity between the D<sub>2</sub>O-based buffer required for the relaxation violated coherence transfer experiment and the H<sub>2</sub>O-based buffer required for the TRACT experiment, the value of  $\tau_c$  was scaled by 1.45 to account for the increased viscosity of D<sub>2</sub>O. This scaling factor was determined by measuring the viscosity of 20% glycerol in D<sub>2</sub>O v/v at 20 °C using a Cannon-Fenske viscometer. Then a pulsed field gradient experiment (ledbpgppr2s from Bruker library) with 1000  $\mu$ s gradient duration at 400 MHz on a Bruker Avance NEO spectrometer was used to determine the temperature dependence of the diffusion coefficient of phenylalanine in the NMR buffer used for the Ile $\delta$ 1-[<sup>13</sup>C,<sup>1</sup>H] samples at 22 °C, 23.5 °C, and 25 °C in a 3 mm NMR tube. The gradient strength was increased in a squared manner from 5% to 95% in 16 steps with 8 scans each. The diffusion coefficient was extrapolated to 20 °C by linear fit and the Stokes-Einstein equation was used to determine the viscosity at 25 °C [2].

The of  $\tau_c$  determined by TRACT for 3C was  $28.7 \pm 1.6$  ns. The value of  $\tau_c$  needed so that the highest order parameter is equal to 1 is 24.8 ns, and the value calculated by HydroNMR was 25.1 ns. The value of  $\tau_c$  from TRACT is within 15%, and the differences in order parameters identified in the main text are large enough for our analysis to hold even with a  $\tau_c$  for 3C of 28.7 ns and  $\tau_c$  determined by setting the highest order parameter to equal 1 for 3C\*D.

**136/72<sup>3C</sup>**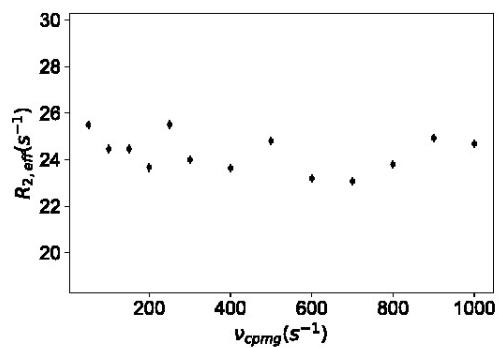**147<sup>3C</sup>**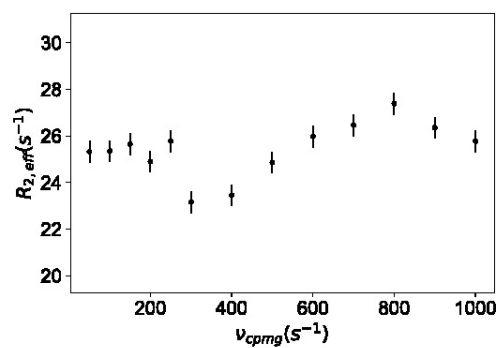**149<sup>3C</sup>**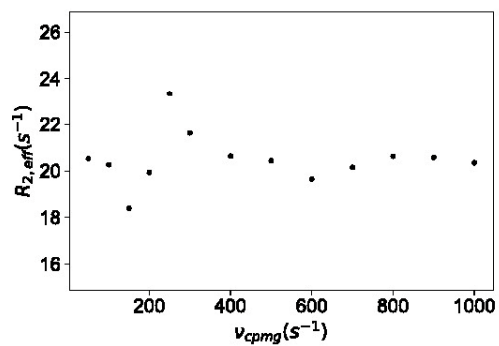**156<sup>3C</sup>**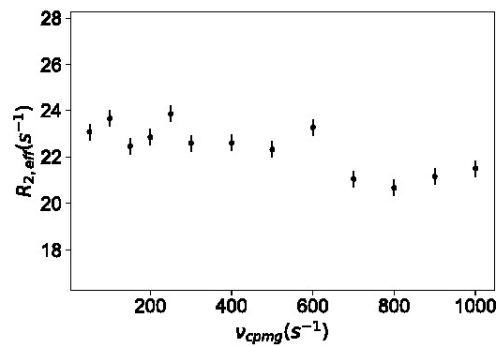**172/36<sup>3C</sup>**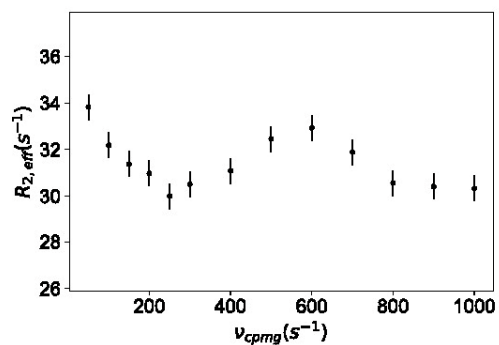**174<sup>3C</sup>**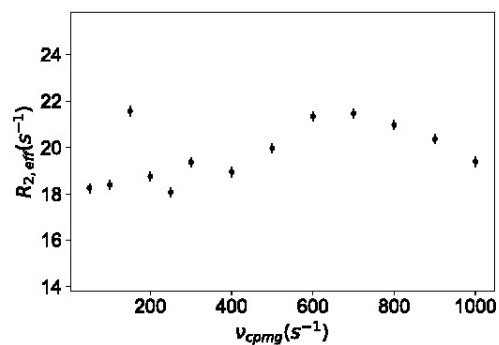**175<sup>3C</sup>**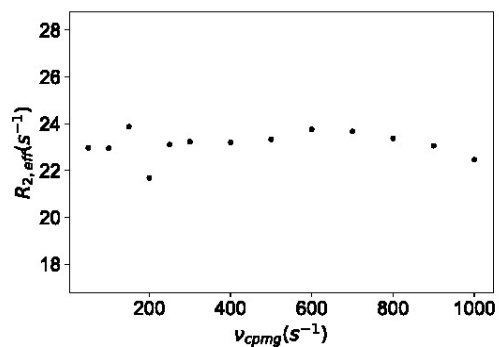**186<sup>3C</sup>**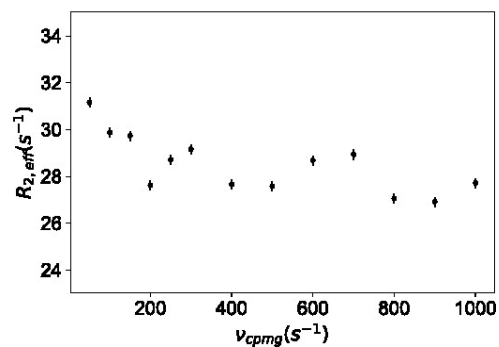

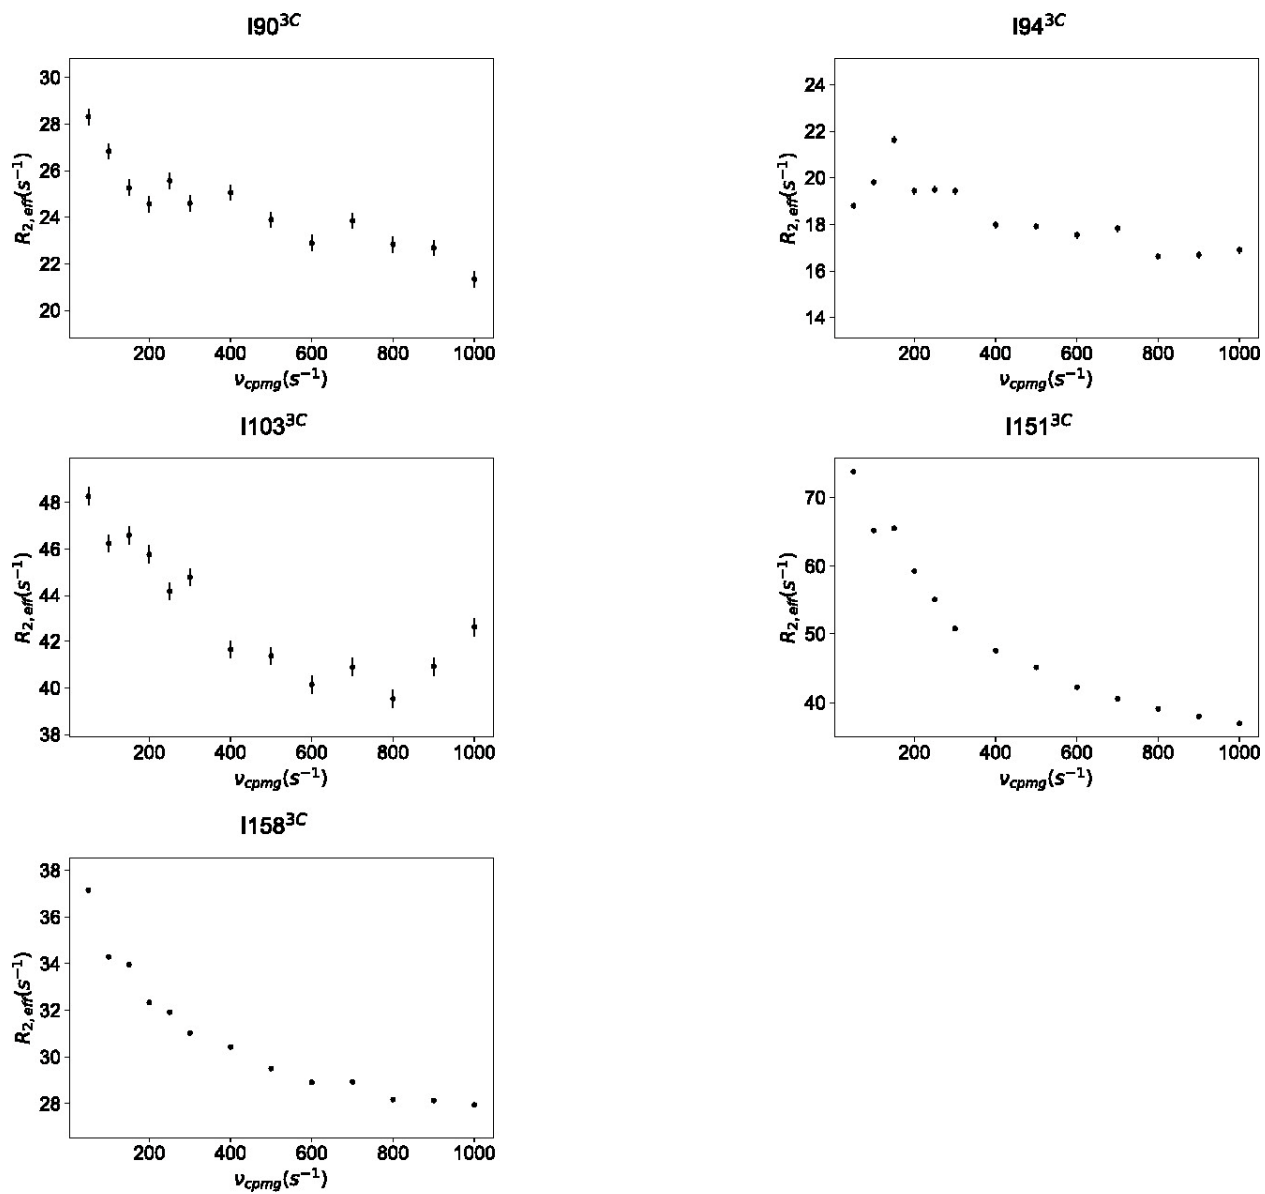

Figure S1. Multiple quantum  $^1H$ - $^{13}C$  CPMG relaxation dispersion plots for d1-methyl Ile groups in the 3C protein.

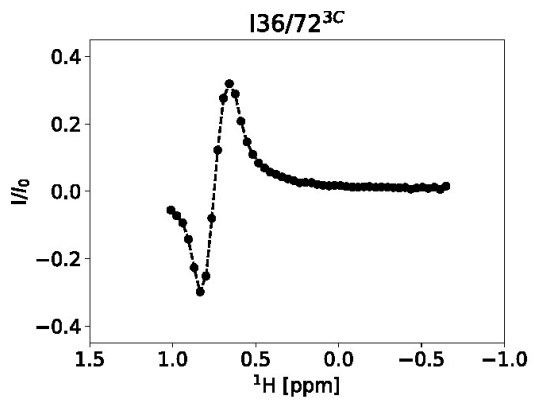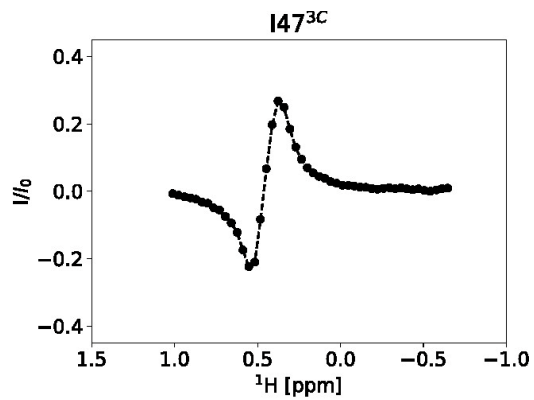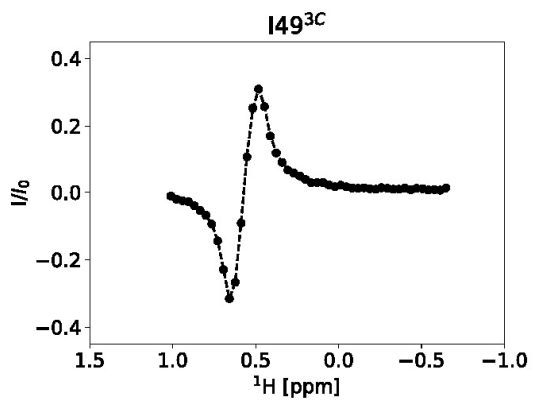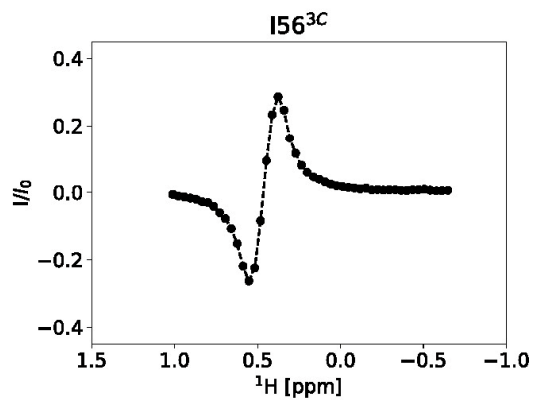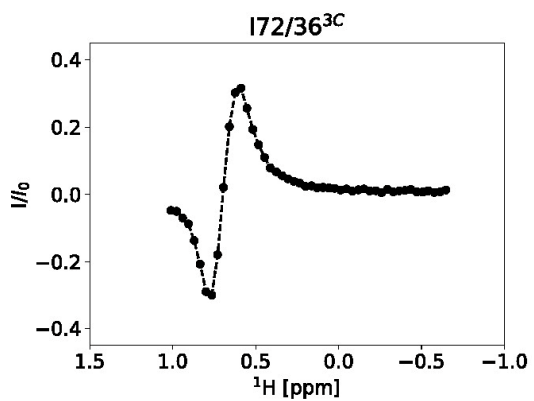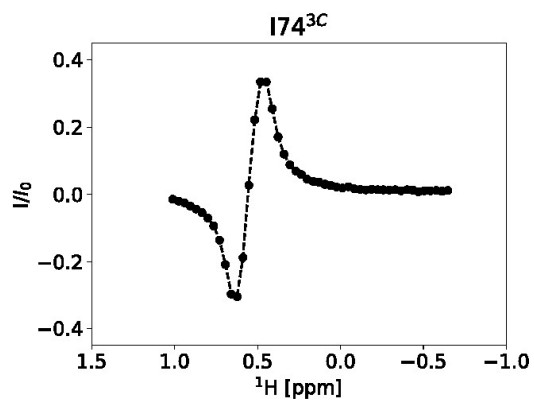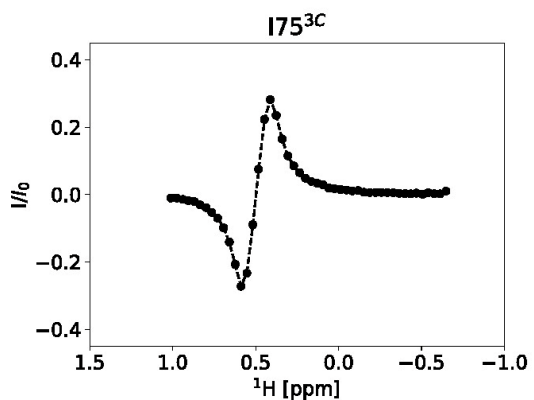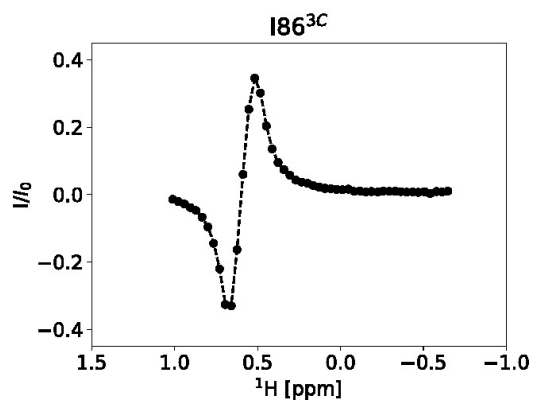

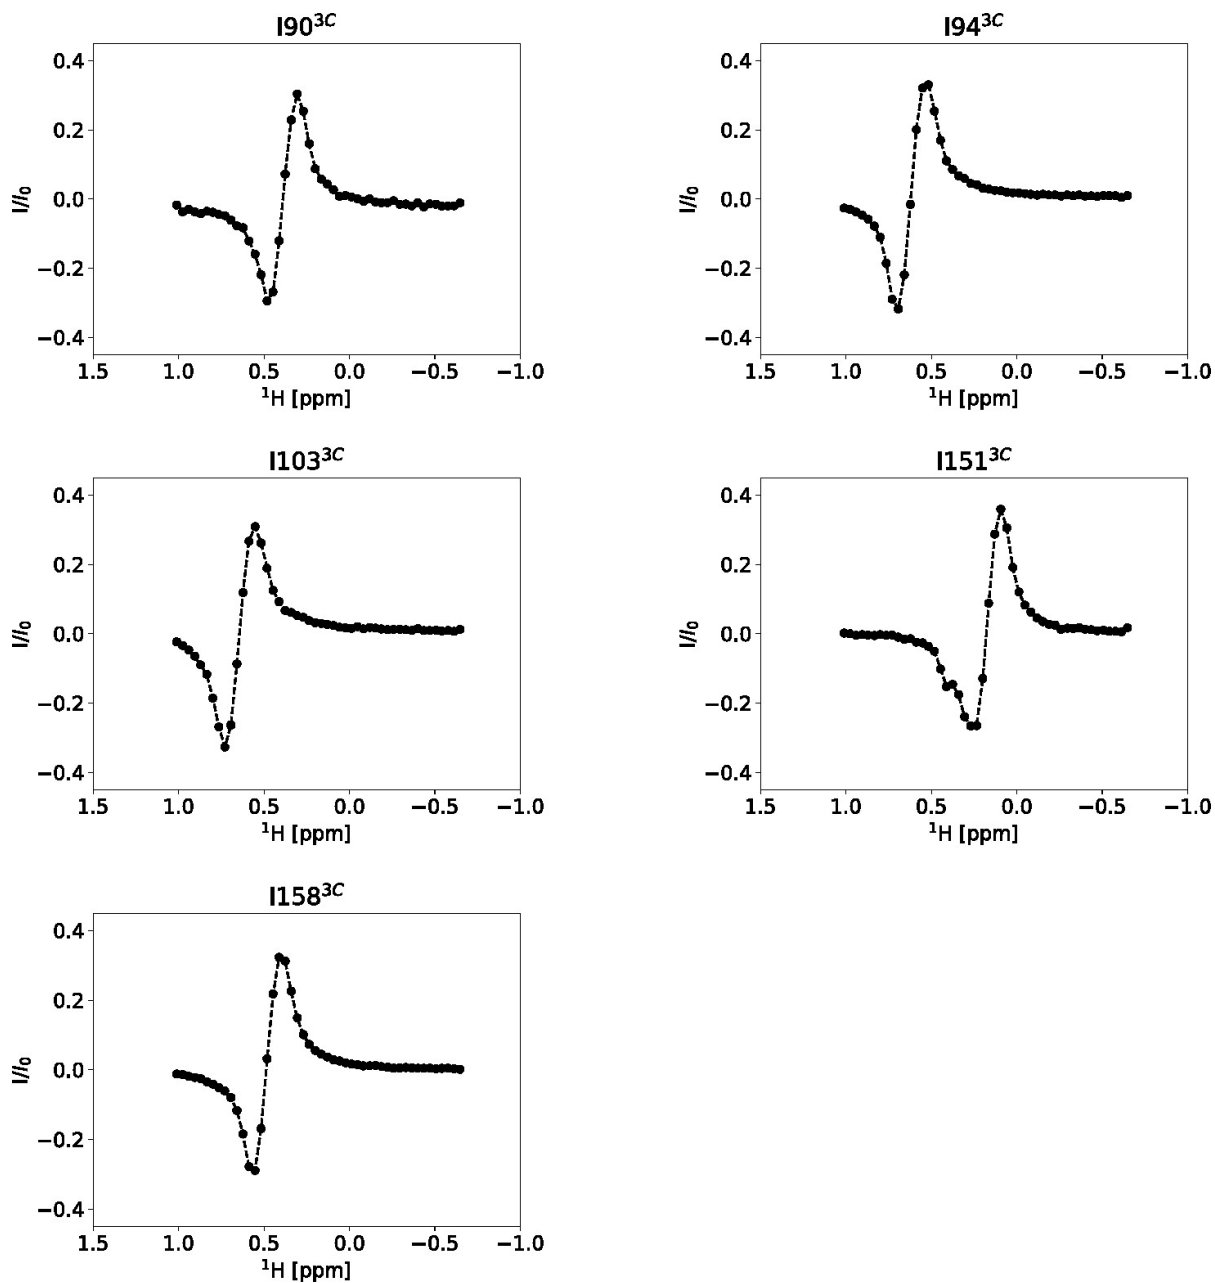

Figure S2.  $^1\text{H}$  CEST profiles for d1-methyl Ile groups in the 3C protein.

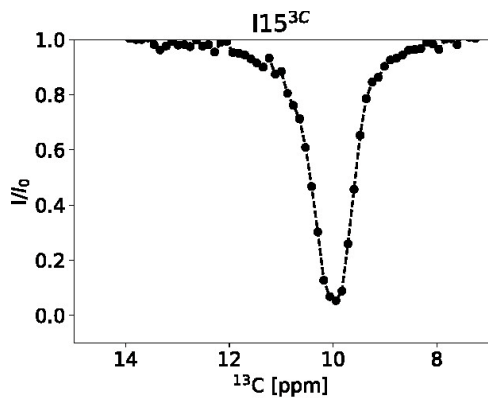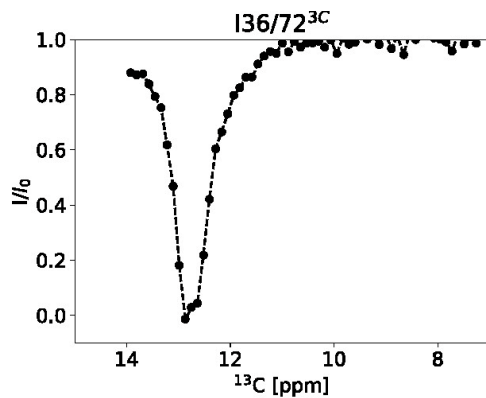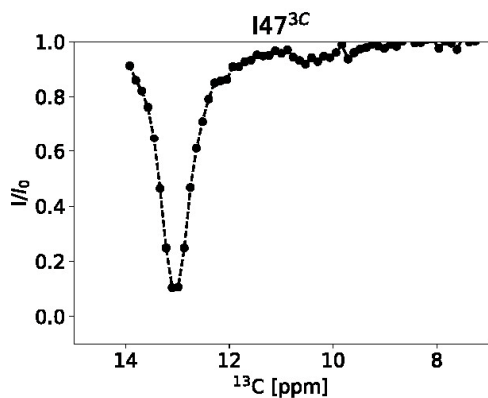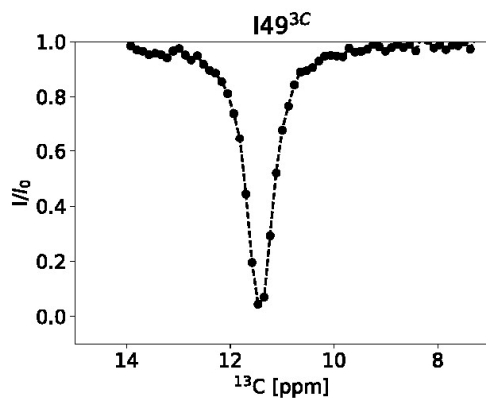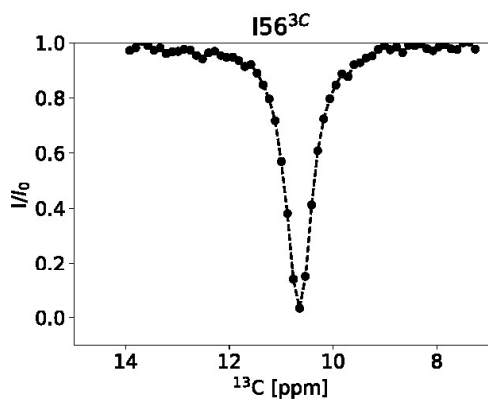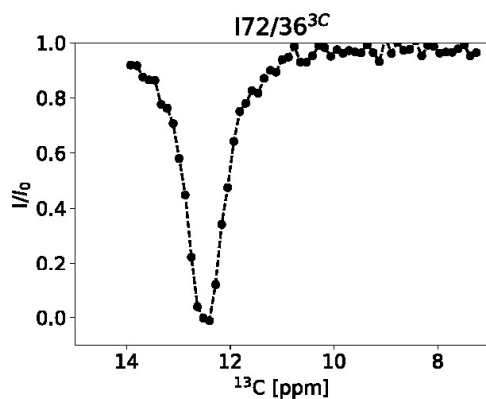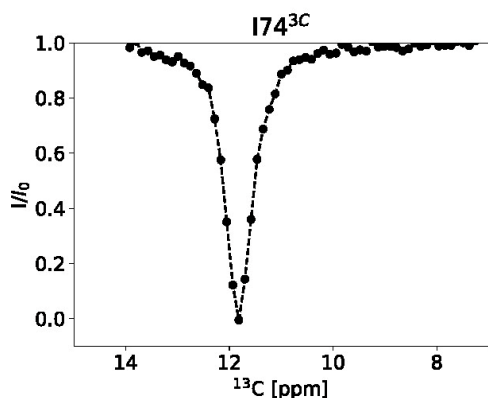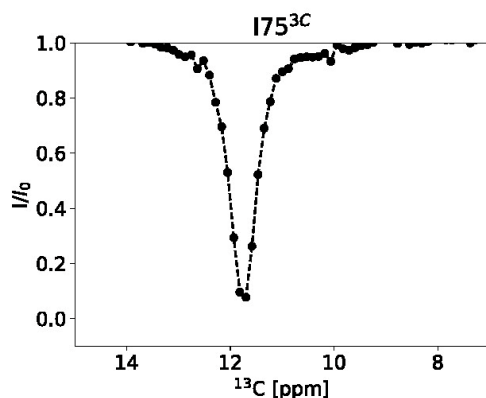

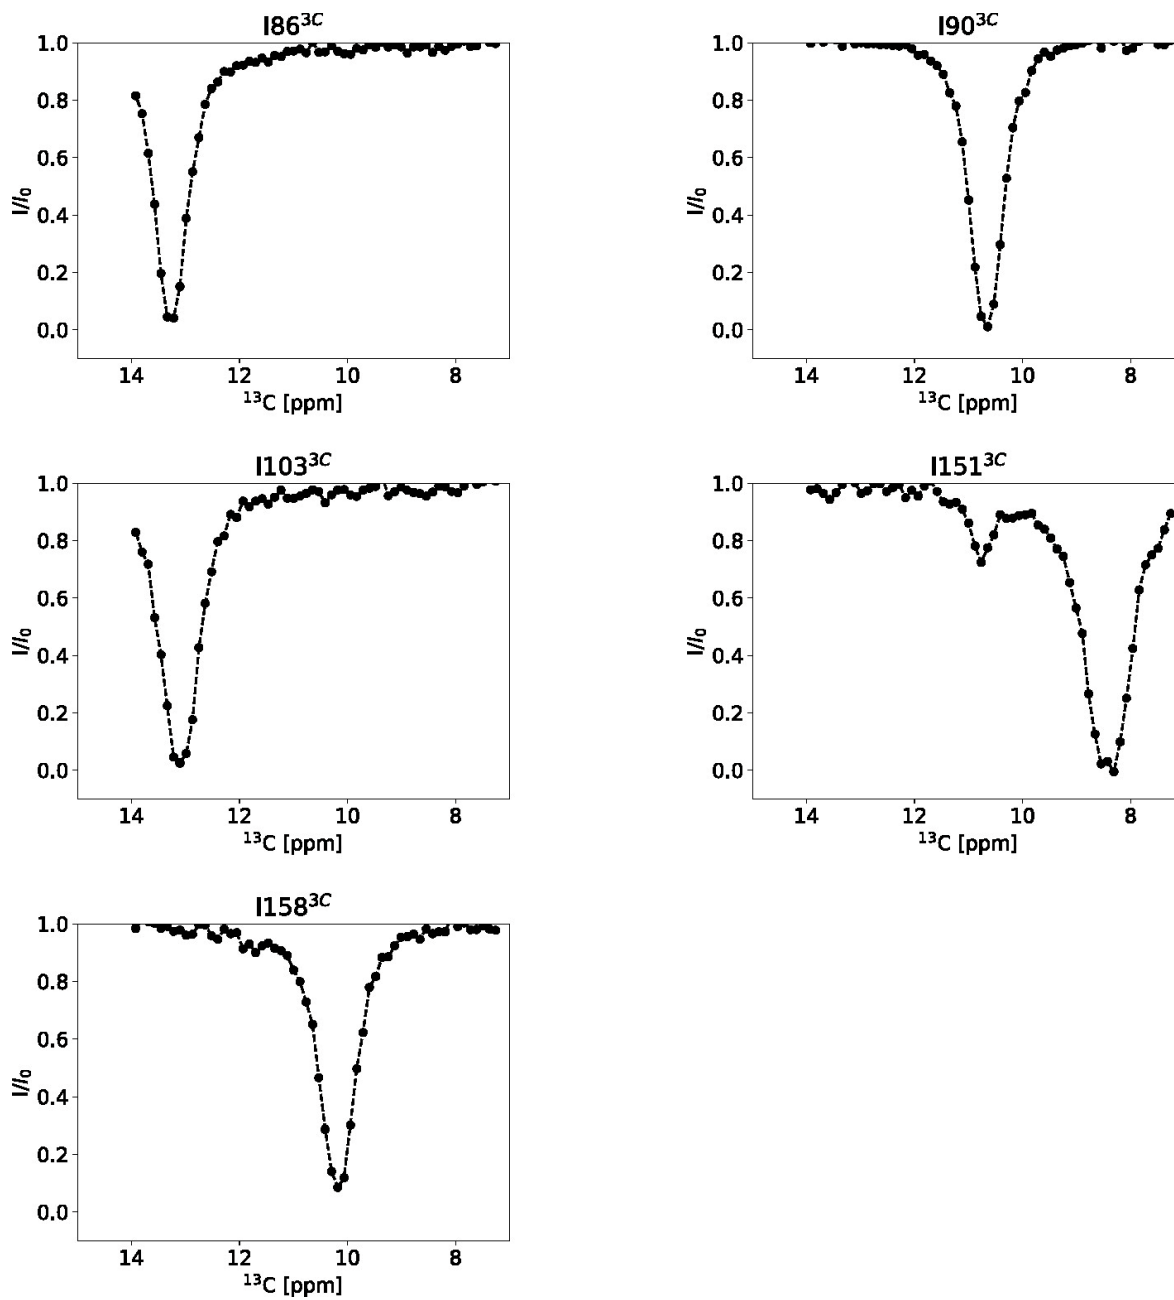

Figure S3.  $^{13}\text{C}$  CEST profiles for d1-methyl Ile groups in the 3C protein.

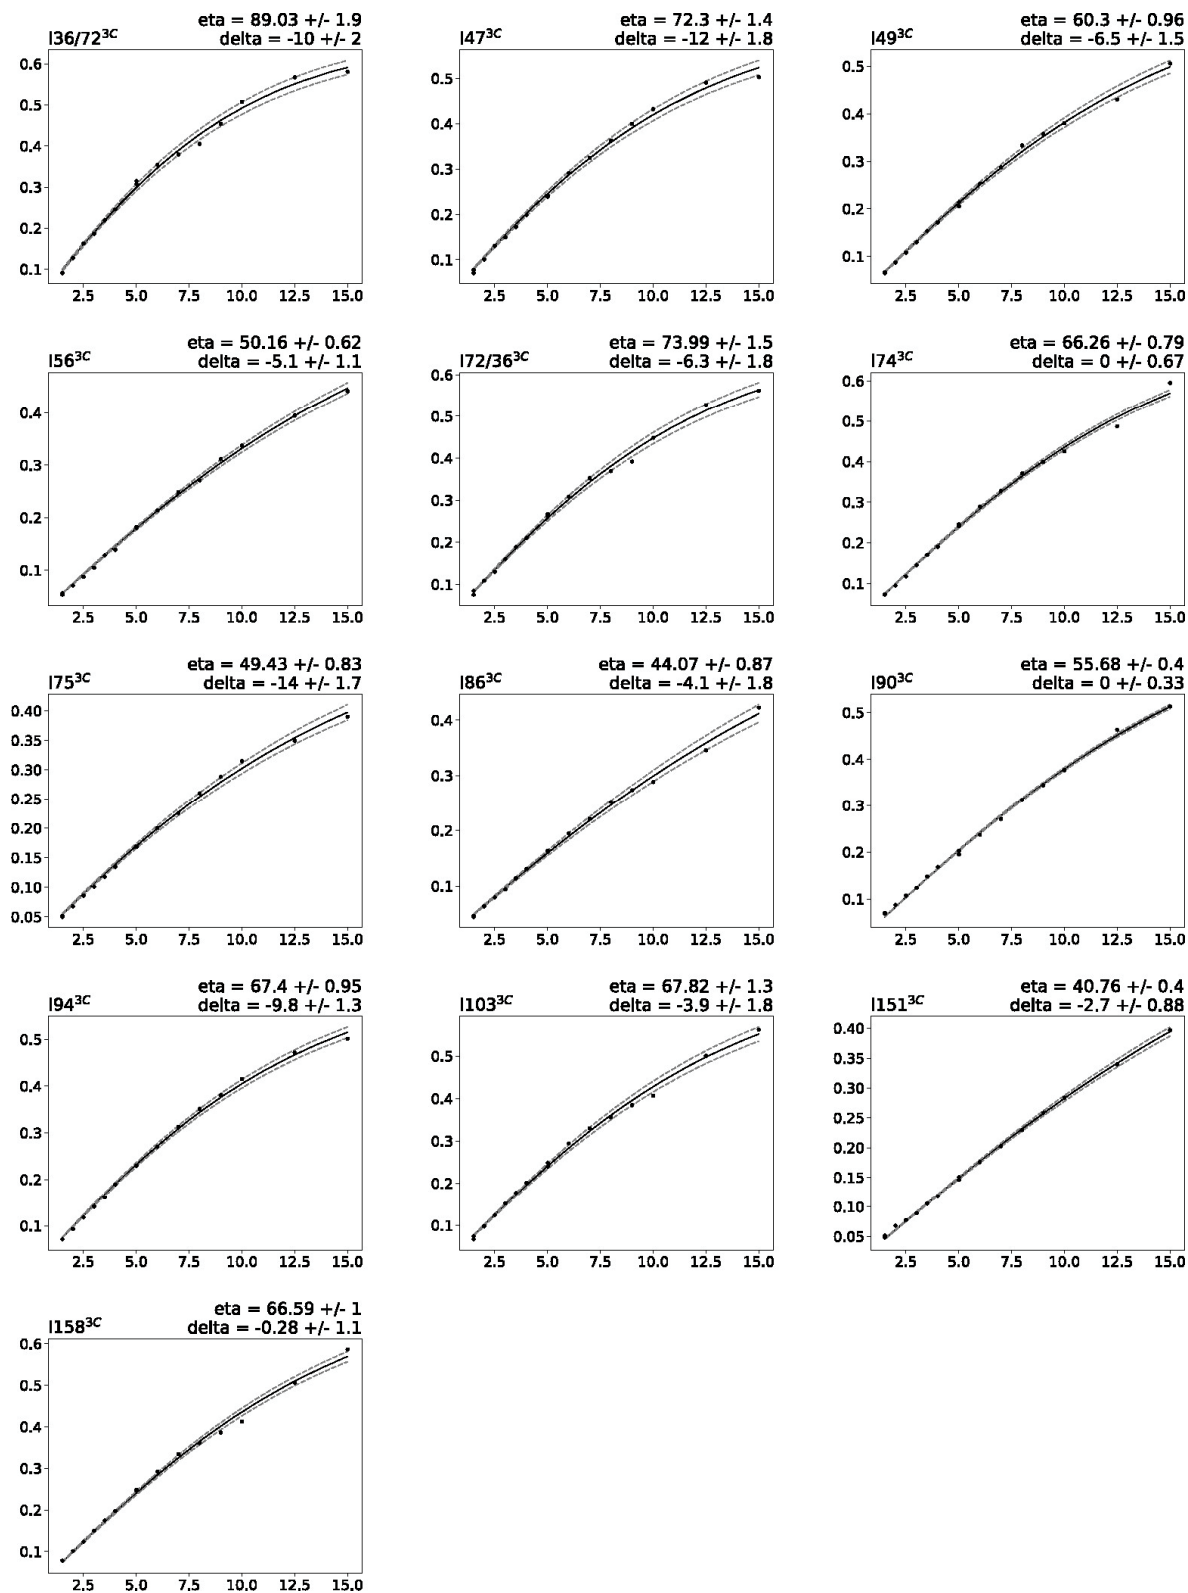

**Figure S4.** Nonlinear fits for the intramethyl  $^1\text{H}$ - $^1\text{H}$  cross-correlated relaxation ( $\eta$ ), including the correction for dipolar interactions with external protons ( $\delta$ ) for d1-methyl Ile groups in the 3C protein. Units for  $\eta$  and  $\delta$  are s $^{-1}$ .



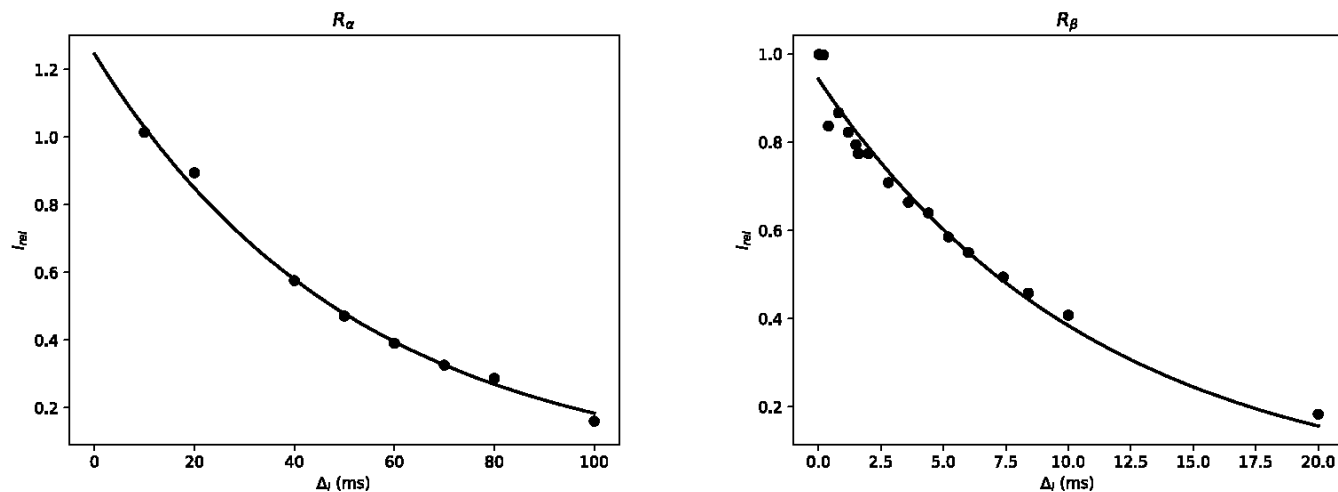

Figure S5. Fitted  $^1\text{H}$ - $^{15}\text{N}$  TRACT results for determination of  $\tau_c$  for 3C.

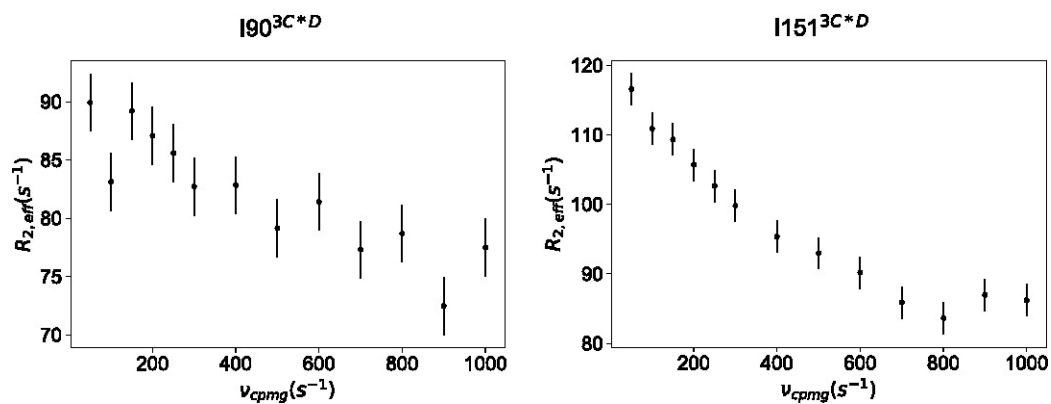

Figure S6. Multiple quantum  $^1\text{H}$ - $^{13}\text{C}$  CPMG relaxation dispersion plots for d1-methyl Ile groups in the 3C domain of the 3CD protein (i.e. 3C $^*D$ ). Only curves with measurable  $R_{ex}$  values are shown; other curves are relatively flat or overly noisy preventing estimation of  $R_{ex}$  values.

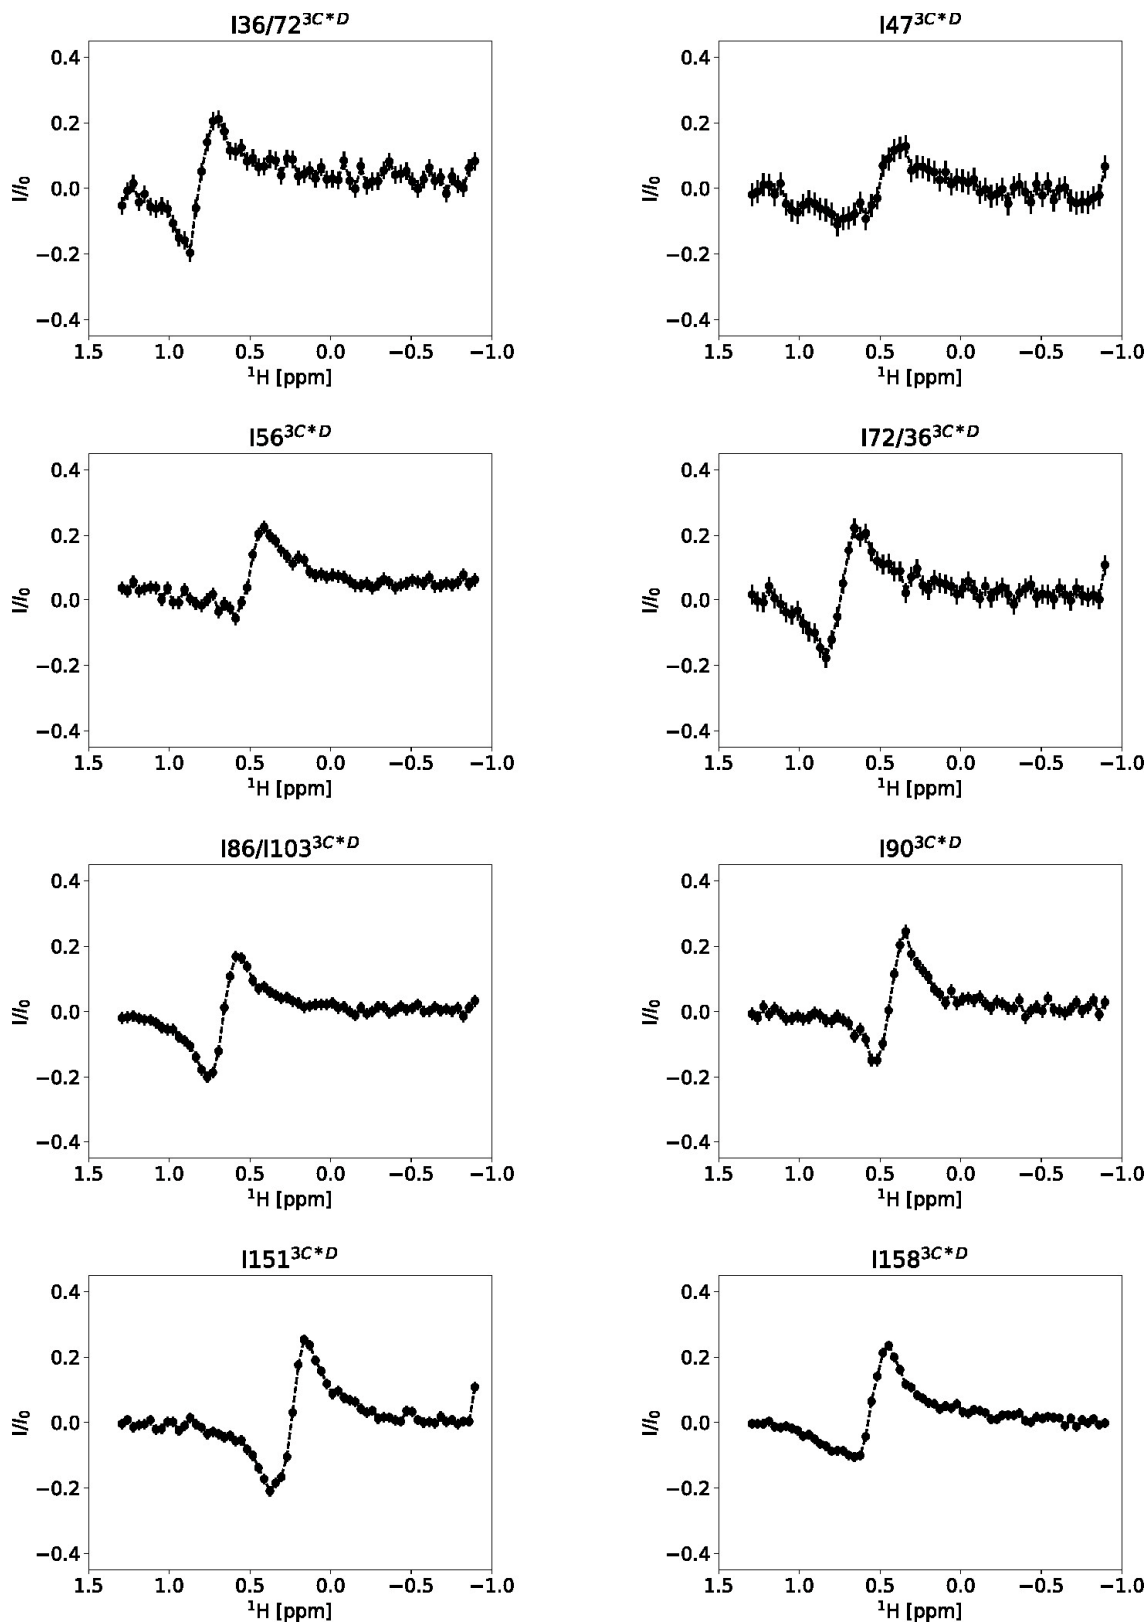

Figure S7.  $^1\text{H}$  CEST profiles for d1-methyl Ile groups in the  $3^{\text{C}}$  domain of the 3CD protein (i.e.  $3^{\text{C}}\text{D}$ ).

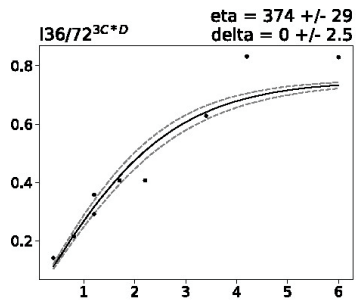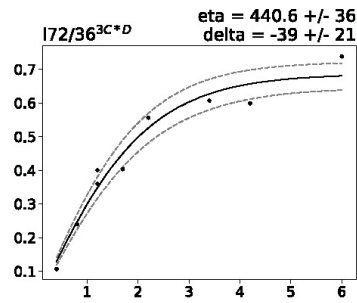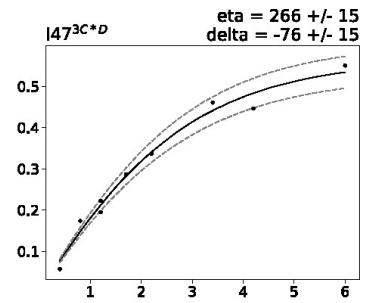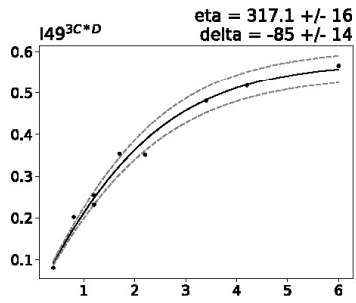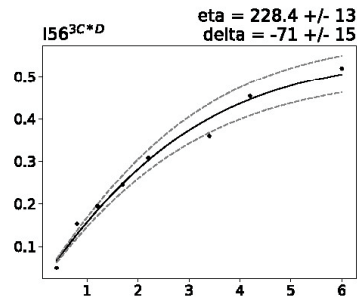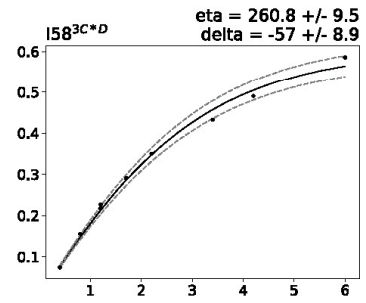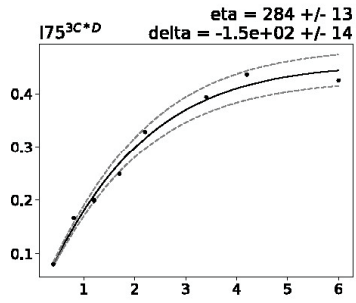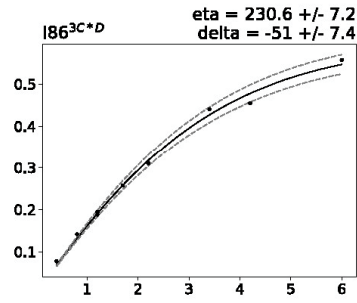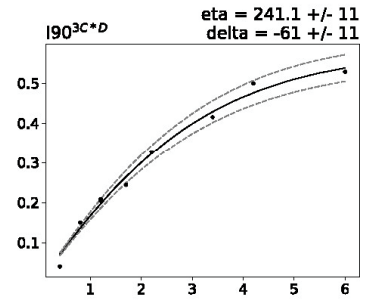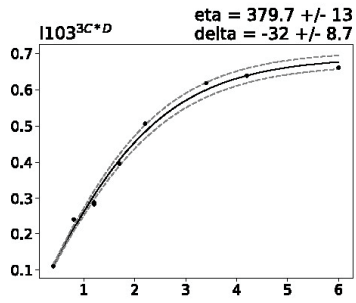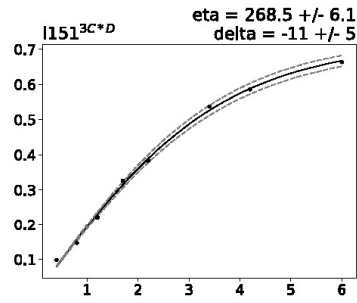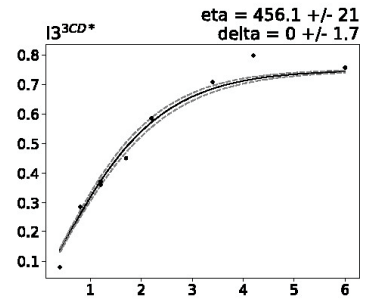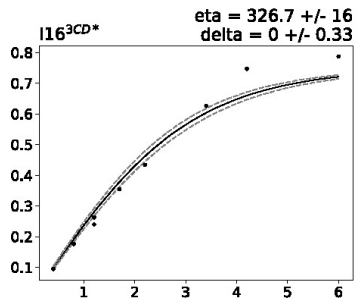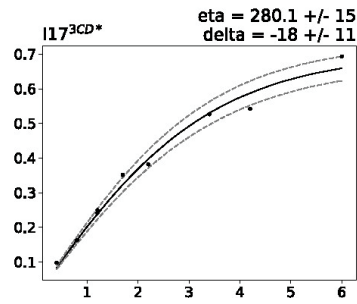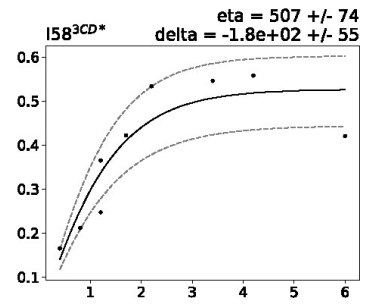

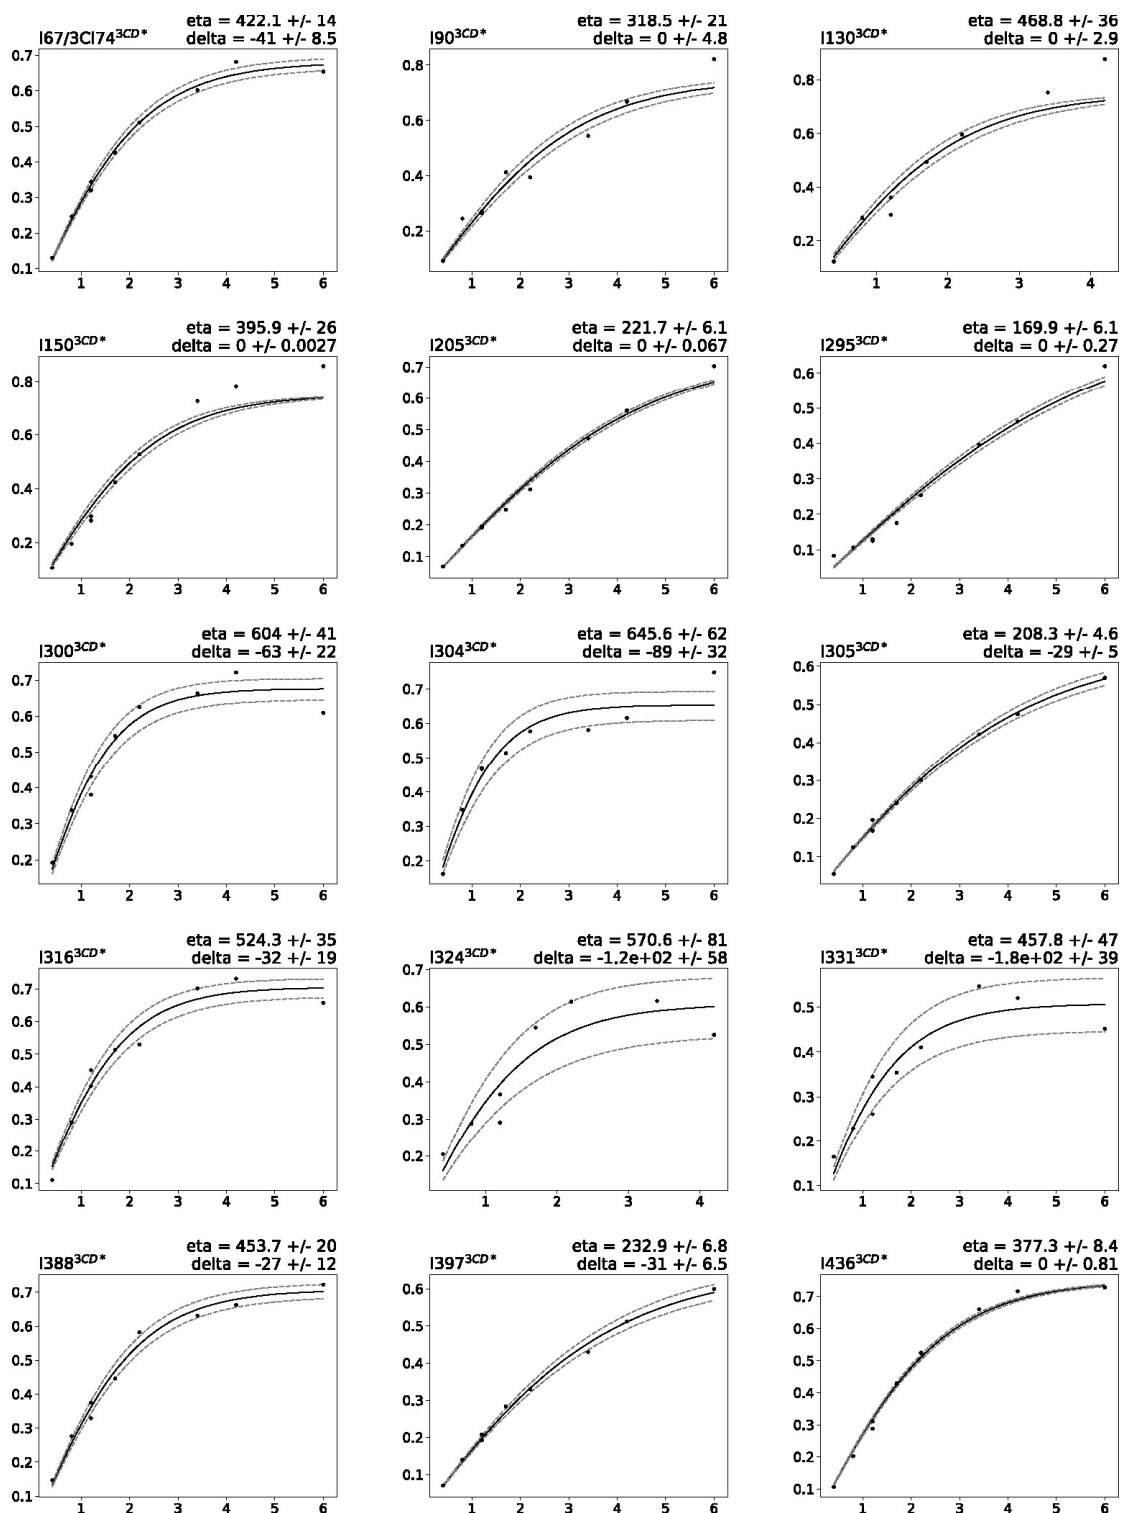

**Figure S8.** Nonlinear fits for the intramethyl  $^1\text{H}$ - $^1\text{H}$  cross-correlated relaxation ( $\eta$ ), including the correction for dipolar interactions with external protons ( $\delta$ ) for d1-methyl Ile groups in the 3CD protein. Units for  $\eta$  and  $\delta$  are  $\text{s}^{-1}$ .  $3\text{C}^*\text{D}$  and  $3\text{CD}^*$  indicate Ile residues in the 3C and 3D domains, respectively, such that the  $3\text{CD}^*$  numbering follows the 3D numbering convention.

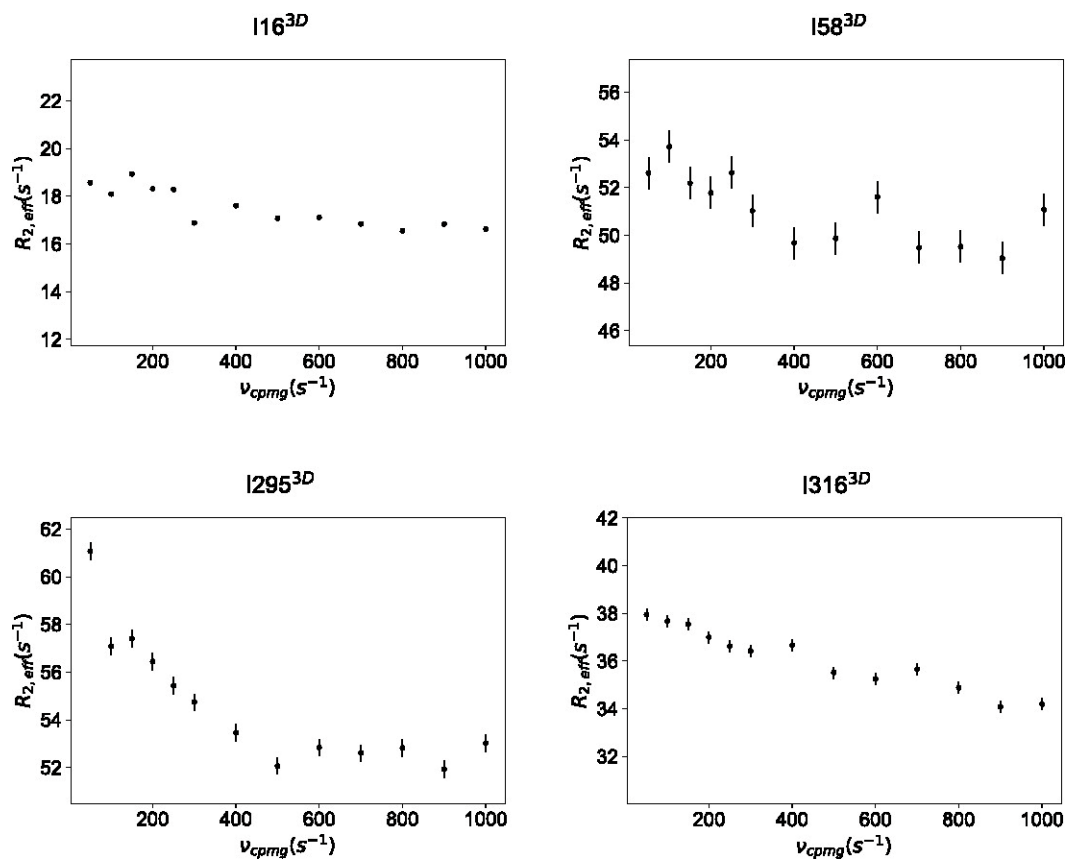

**Figure S9.** Multiple quantum  $^1H$ - $^{13}C$  CPMG relaxation dispersion plots for d1-methyl Ile groups in 3D protein. Only curves with measurable  $R_{ex}$  values are shown; other curves are relatively flat or overly noisy preventing estimation of  $R_{ex}$  values.

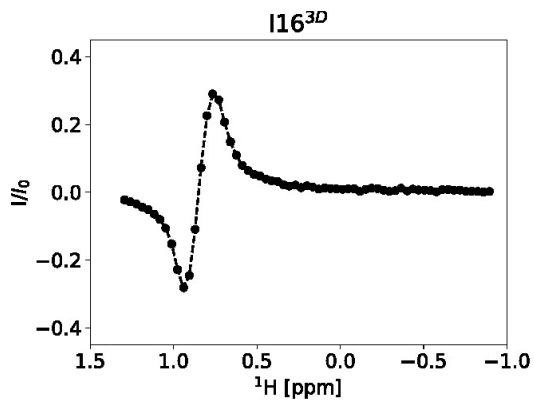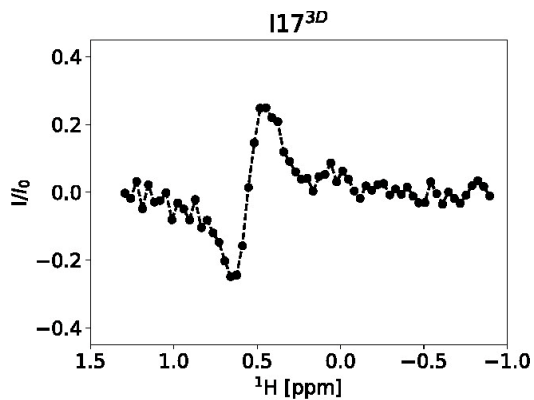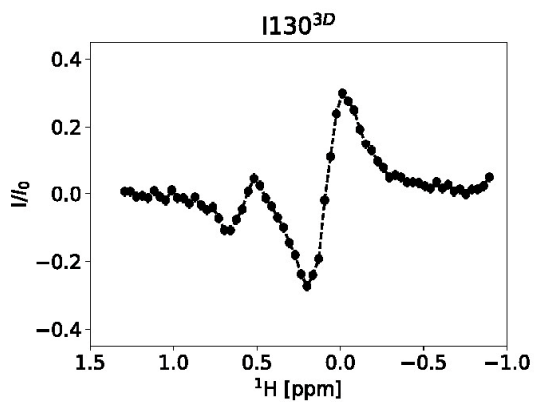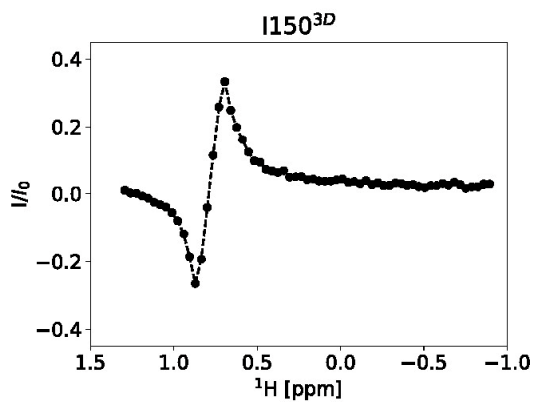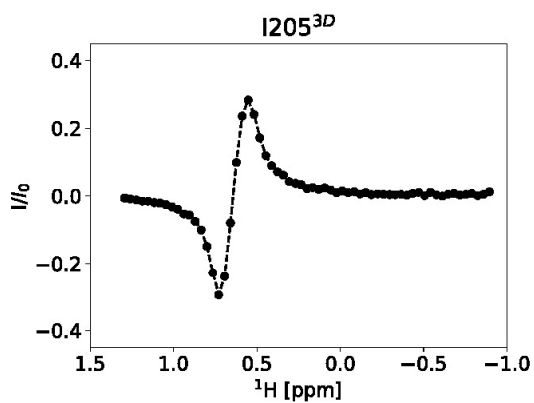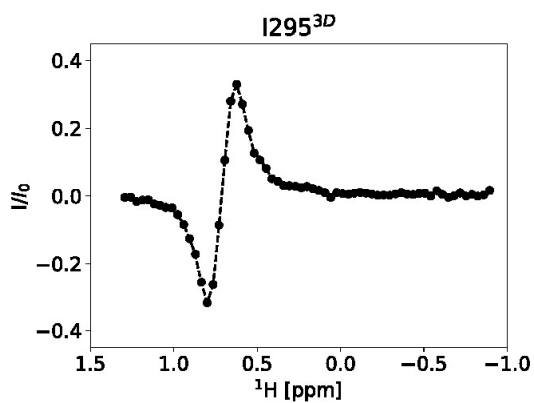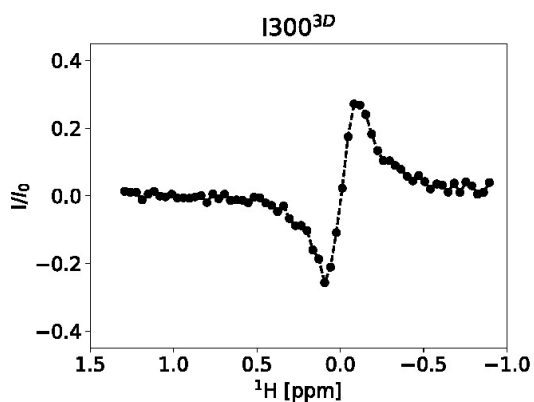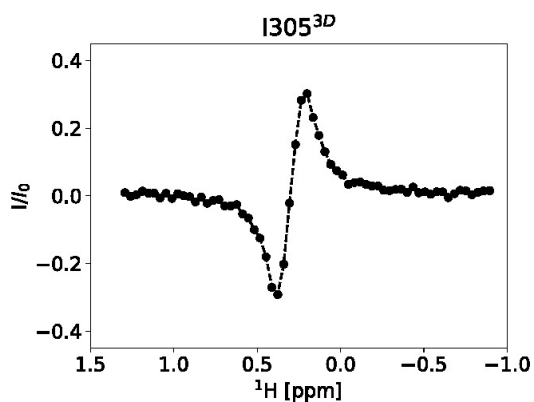

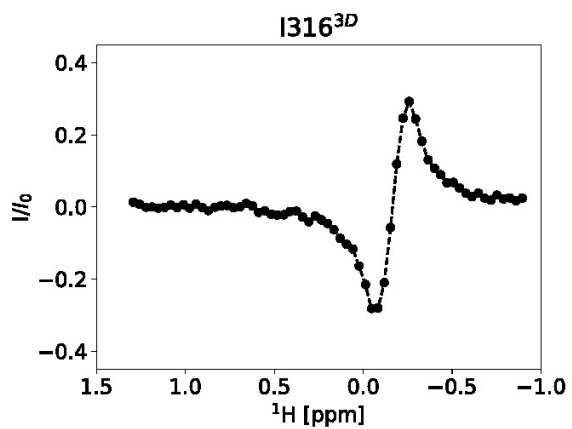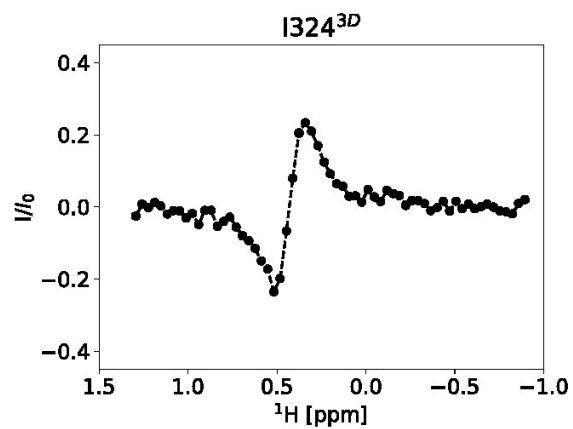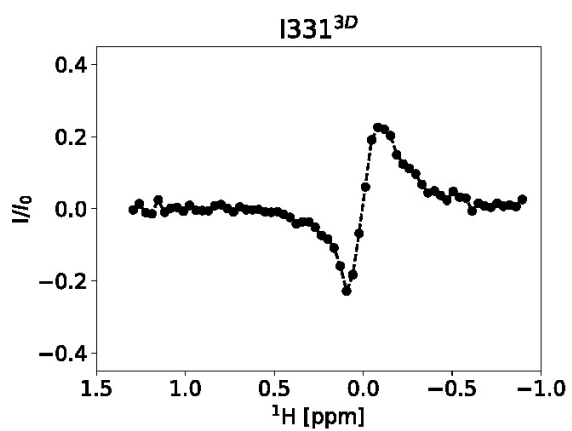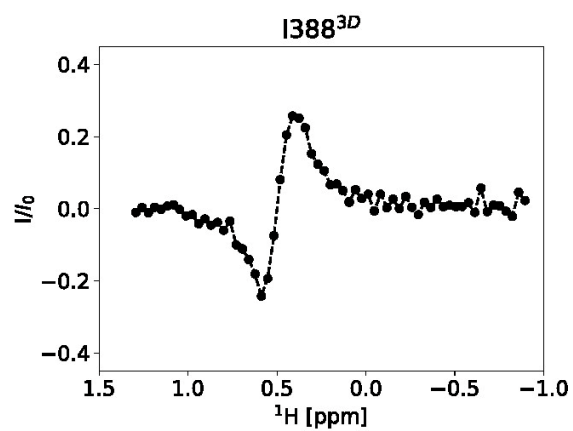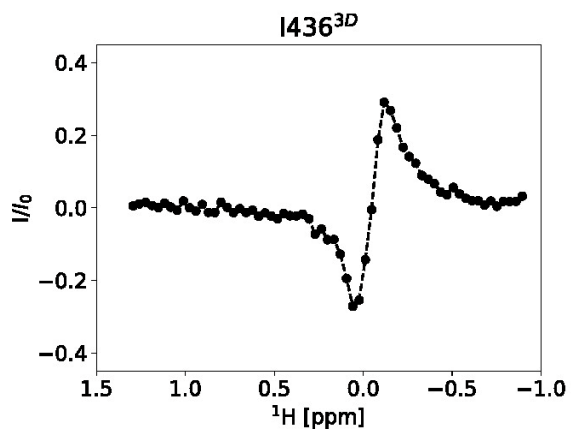

Figure S10.  $^1\text{H}$  CEST profiles for d1-methyl Ile groups in the 3D protein.

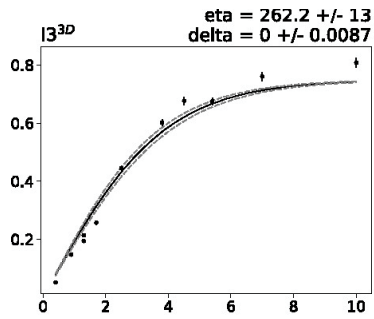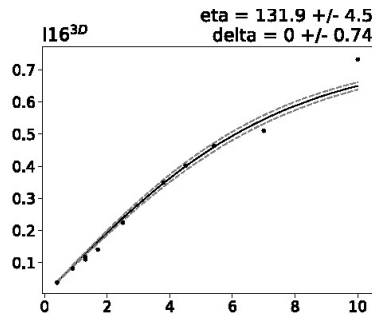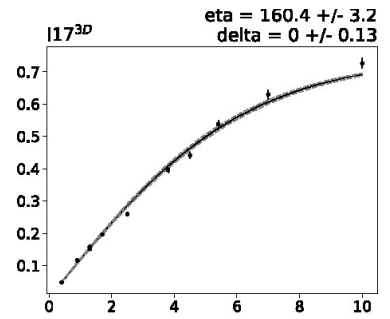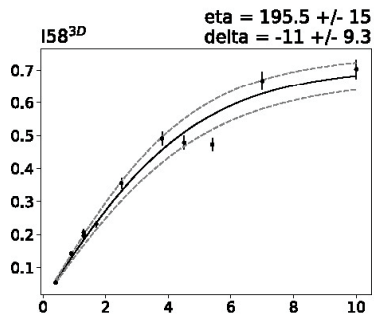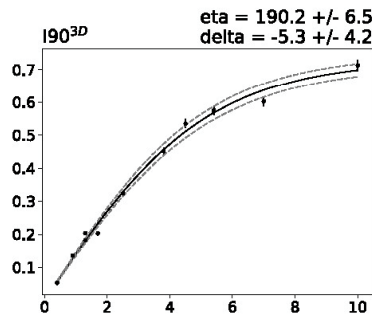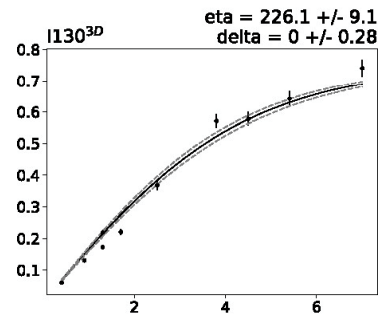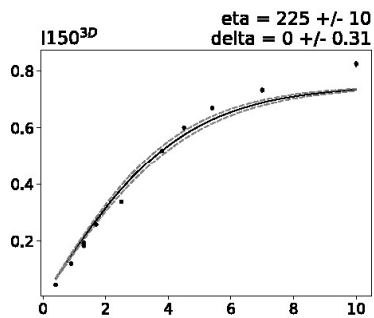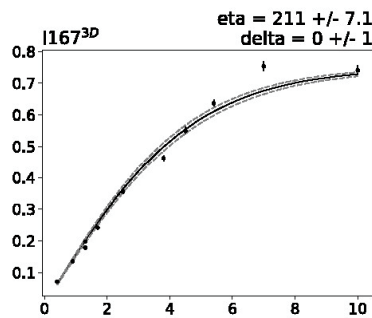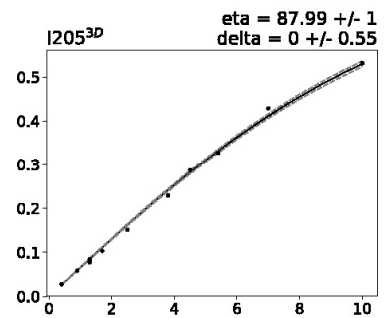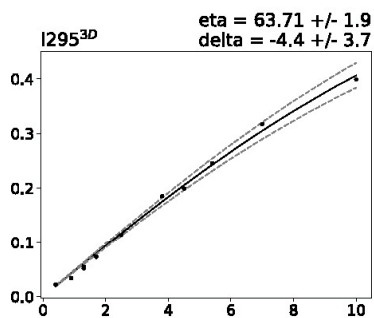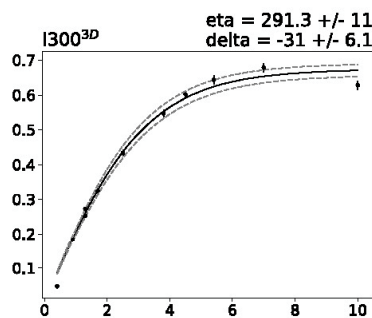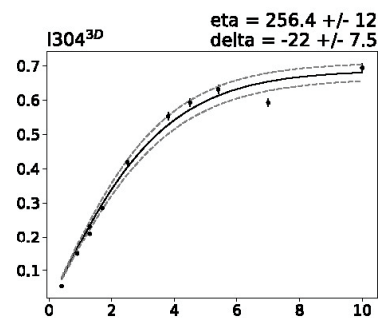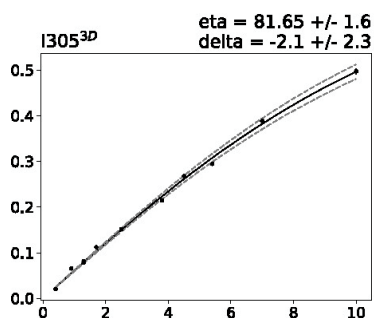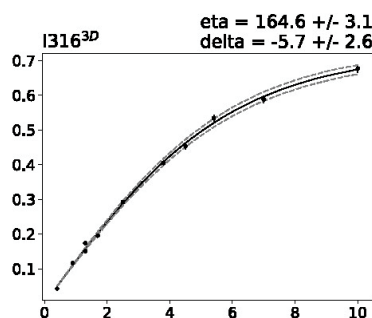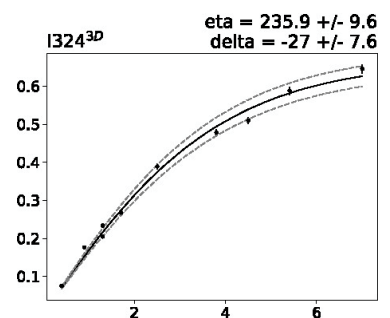



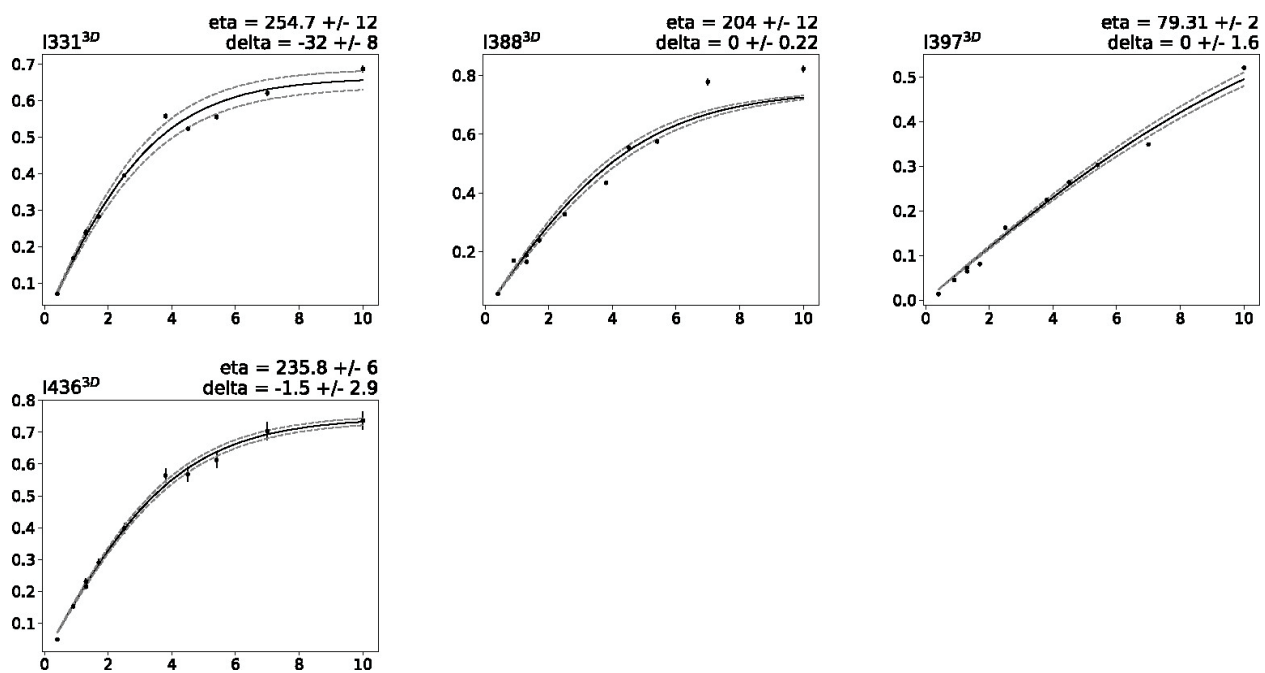

**Figure S11.** Nonlinear fits for the intramethyl  $^1\text{H}$ - $^1\text{H}$  cross-correlated relaxation ( $\eta$ ), including the correction for dipolar interactions with external protons ( $\delta$ ) for d1-methyl Ile groups in the 3D protein. Units for  $\eta$  and  $\delta$  are  $\text{s}^{-1}$ .

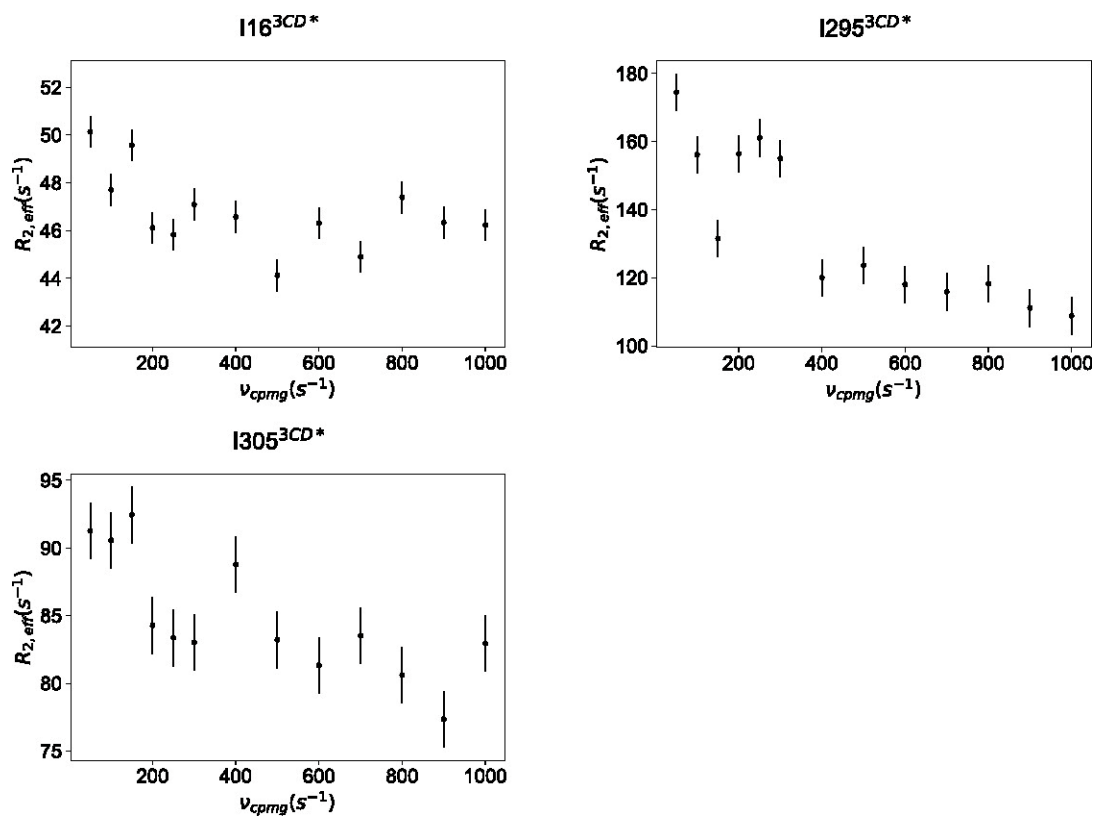

**Figure S12.** Multiple quantum  $^1H$ - $^{13}C$  CPMG relaxation dispersion plots for d1-methyl Ile groups in the 3D domain of the 3CD protein (i.e. 3CD\*). Only curves with measurable  $R_{ex}$  values are shown; other curves are relatively flat or overly noisy preventing estimation of  $R_{ex}$  values.

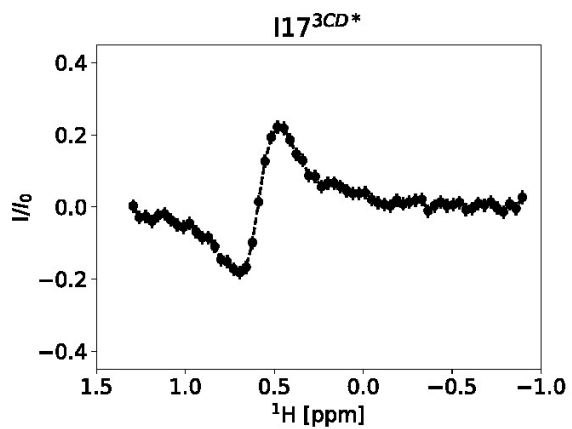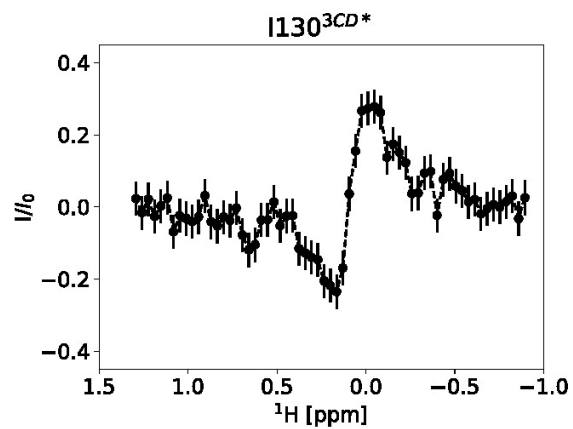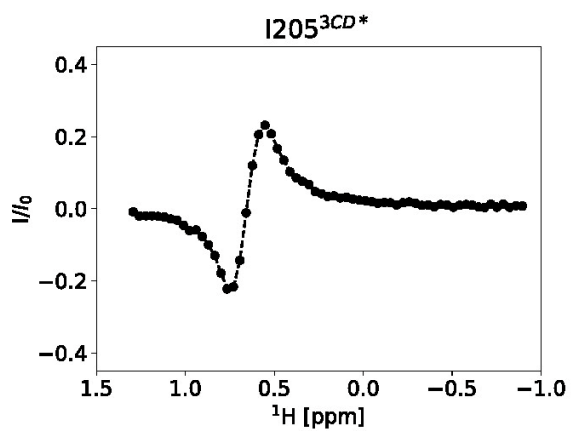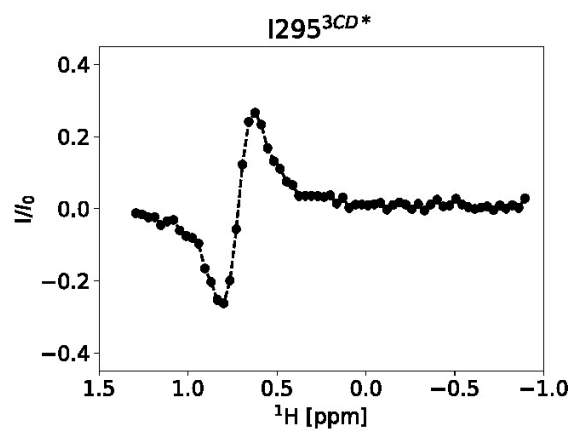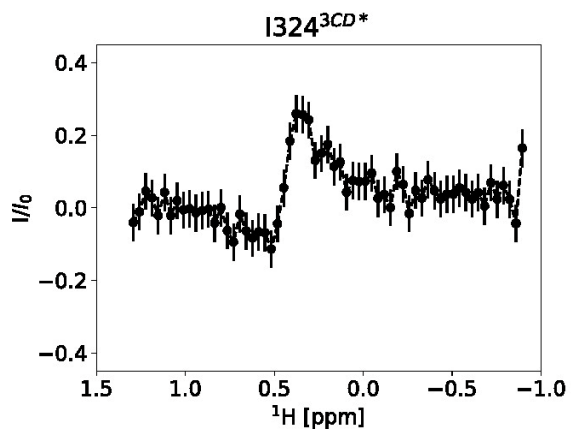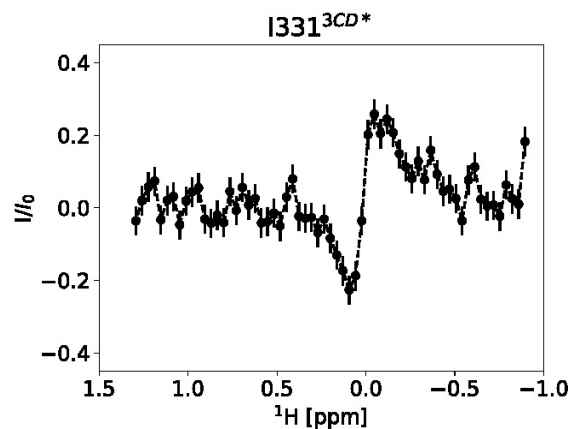

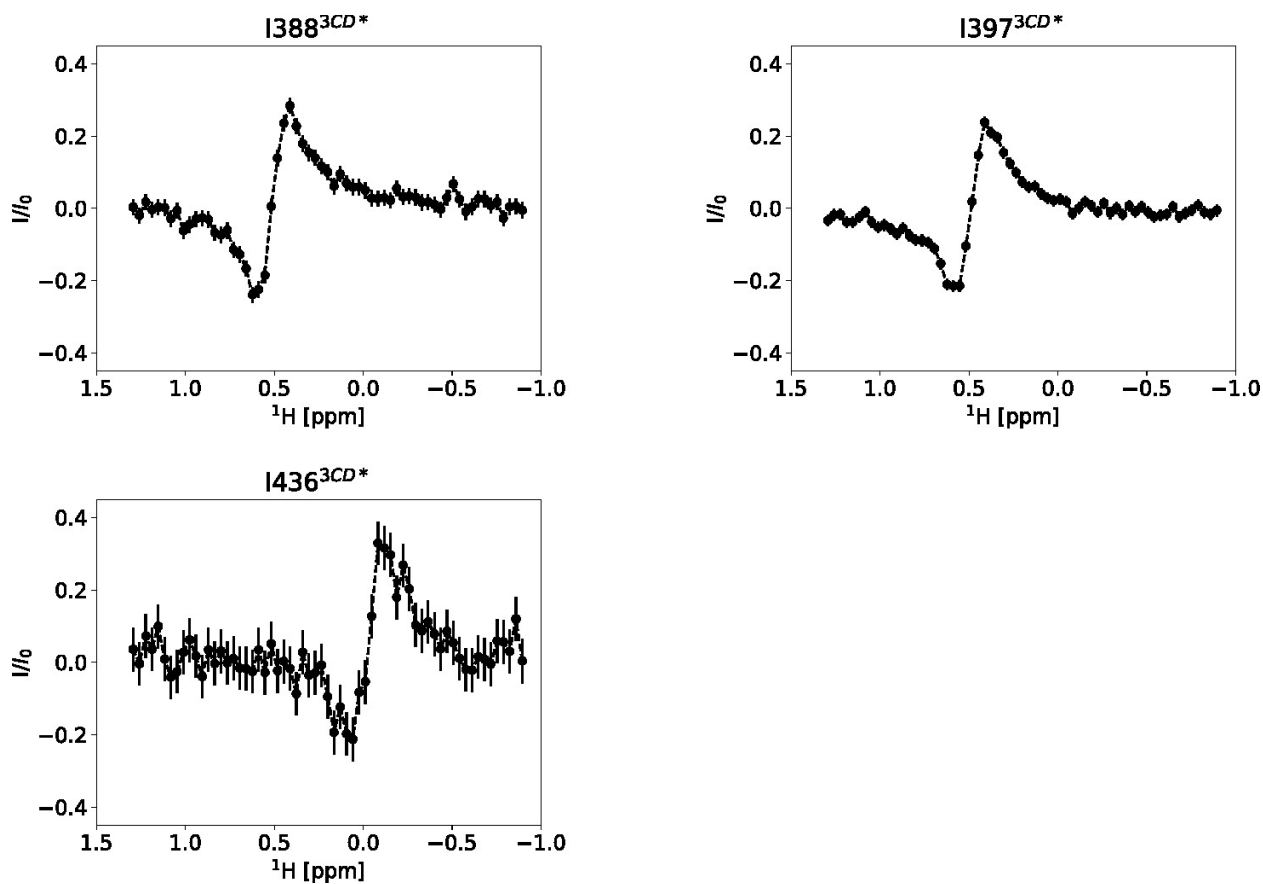

**Figure S13.**  $^1\text{H}$  CEST profiles for d1-methyl Ile groups in the 3D domain of the 3CD protein (i.e. 3CD\*).

## References

1. Lee, D.; Hilty, C.; Wider, G.; Wüthrich, K. Effective Rotational Correlation Times of Proteins from NMR Relaxation Interference. *J. Magn. Reson.*, **2006**, *178*, 72–76.
2. Li, W.; Kagan, G.; Hopson, R.; Williard, P.G. Measurement of Solution Viscosity via Diffusion-Ordered NMR Spectroscopy (DOSY). *J. Chem. Educ.*, **2011**, *88*, 1331–1335
